| Date       | CtN1  | GC/ml-N1 | CtE   | GC/ml-E | pH   | Conductivity | Dissolved-Oxygen | Total-Suspended-Solids | NH4  | PO4 | tCOD | sCOD |
|------------|-------|----------|-------|---------|------|--------------|------------------|------------------------|------|-----|------|------|
| 20/10/2020 | 37.20 | 5.60     | 40.14 | 1.20    | 7.4  | 811          | 6.53             | 16                     | 24.5 | 1.6 | 294  | 76   |
| 20/10/2020 |       |          |       |         | 7.56 | 567          | 9.64             | 46                     | 4.4  | 2.3 | 342  | 70   |
| 20/10/2020 |       |          |       |         | 7.53 | 1097         | 5.1              | 687                    | 57.8 | 4.1 | NA   | NA   |
| 22/10/2020 |       |          |       |         | 7.74 | 444          | 9.96             | 4                      | 2.6  | 0.6 | 489  | 428  |
| 23/10/2020 |       |          |       |         | 8.59 | 1225         | 3.45             | 258                    | 88.3 | 2.5 | 515  | 355  |
| 04/11/2020 |       |          |       |         | 8.25 | 734          | 9.08             | 31                     | 36.8 | 2.5 | 272  | 45   |
| 04/11/2020 | 42.57 | 0.13     | 39.65 | 0.27    | 8.43 | 980          | 8.06             | 84                     | 56.5 | 3.5 | 35   | 25   |
| 04/11/2020 | 41.91 | 0.13     |       |         | 6.91 | 307          | 8.41             | 514                    | 3.7  | 3.2 | 148  | 53   |
| 04/11/2020 |       |          |       |         | 7.3  | 726          | 7.52             | 201                    | 28.4 | 3.8 | 304  | 80   |
| 04/11/2020 | 35.62 | 8.67     | 39.19 | 0.27    | 8.36 | 854          | 5.11             | 76                     | 48.2 | 2.5 | 274  | 64   |
| 04/11/2020 |       |          | 40.24 | 0.13    | 6.74 | 249          | 7.54             | 79                     | 13.5 | 2   | 375  | 90   |
| 04/11/2020 |       |          |       |         | 7.12 | 608          | 6.41             | 62                     | 5    | 1.9 | 746  | 363  |
| 04/11/2020 |       |          | 35.14 | 3.73    | 6.54 | 57           | 11.81            | 3                      | 1.5  | 21  | 61   | 25   |
| 09/11/2020 |       |          |       |         | 7.65 | 1156         | 1.34             | 321                    | 80   | 21  | 766  | 330  |
| 09/11/2020 | 41.68 | 0.13     |       |         | 8.05 | 744          | 7.23             | 98                     | 31.3 | 1.9 | 167  | 49   |
| 09/11/2020 |       |          |       |         | 7.63 | 366          | 1.92             | 146                    | 36.1 | 3.8 | 221  | 146  |
| 09/11/2020 |       |          | 43.66 | 0.00    | 7.97 | 800          | 3.32             | 263                    | 36.2 | 3.2 | 264  | 193  |
| 09/11/2020 | 38.41 | 1.47     | 36.63 | 1.47    | 7.02 | 252          | 8.31             | 67                     | 6.4  | 2.5 | 93   | 25   |
| 09/11/2020 |       |          |       |         | 7.29 | 320          | 0.7              | 898                    | 22.8 | 11  | 1500 | 598  |
| 09/11/2020 |       |          |       |         | 8.63 | 759          | 2.78             | 280                    | 32.1 | 2.5 | 364  | 242  |
| 09/11/2020 | 38.47 | 1.33     | 38.57 | 0.40    | 7.29 | 320          | 0.7              | 898                    | 22.8 | 11  | 1500 | 598  |
| 09/11/2020 |       |          |       |         | 7.77 | 325          | 4.02             | 278                    | 13.6 | 3.5 | 549  | 285  |
| 09/11/2020 |       |          |       |         | 7.52 | 531          | 9.78             | 26                     | 2.2  | 2   | 25   | 25   |
| 11/11/2020 | 37.86 | 12.00    | 35.42 | 21.73   | 6.14 | 451          | 6.39             | 758                    | 33.4 | 18  | 1578 | 351  |
| 11/11/2020 | 41.24 | 1.47     |       |         | 7.4  | 463          | 8.7              | 27                     | 2.1  | 2.1 | 25   | 25   |
| 11/11/2020 |       |          |       |         | 9.24 | 1685         | 1.03             | 112                    | 80   | 23  | 432  | 255  |

|            |       |      |       |      |      |      |       |      |      |     |      |      |
|------------|-------|------|-------|------|------|------|-------|------|------|-----|------|------|
| 11/11/2020 | 40.41 | 2.53 | 37.27 | 7.47 | 7.07 | 521  | 6.64  | 42   | 24.4 | 3.6 | 25   | 25   |
| 11/11/2020 |       |      |       |      | 8.62 | 777  | 2.23  | 307  | 54.1 | 2.1 | 352  | 25   |
| 11/11/2020 |       |      |       |      | 9.79 | 1785 | 2.58  | 1760 | 80   | 20  | 1783 | 588  |
| 11/11/2020 | 40.28 | 2.80 |       |      | 7.17 | 589  | 6.78  | 100  | 14.7 | 1.4 | 33   | 25   |
| 11/11/2020 | 42.53 | 0.93 | 38.70 | 3.07 | 7.16 | 364  | 3.33  | 331  | 21.9 | 4.5 | 392  | 25   |
| 11/11/2020 |       |      |       |      | 6.18 | 374  | 0.72  | 81   | 19.8 | 1.8 | 198  | 25   |
| 11/11/2020 |       |      |       |      | 8.14 | 795  | 0.9   | 102  | 48.9 | 4.2 | 142  | 25   |
| 16/11/2020 |       |      |       |      | 7.67 | 1069 | 10.95 | 12   | 5.5  | 1.1 | 25   | 44   |
| 16/11/2020 | 42.97 | 0.53 |       |      | 8.62 | 1650 | 8.67  | 224  | 25.5 | 0.5 | 316  | 35   |
| 16/11/2020 |       |      |       |      | 9.45 | 3776 | 1.18  | 223  | 80   | 13  | 913  | 207  |
| 16/11/2020 |       |      |       |      | 6.82 | 2082 | 0.84  | 1560 | 77.8 | 57  | 1786 | 757  |
| 16/11/2020 |       |      |       |      | 6.8  | 703  | 2.38  | 132  | 0.7  | 0.5 | 239  | 25   |
| 16/11/2020 |       |      |       |      | 6.96 | 1505 | 0.62  | 1820 | 51.9 | 46  | 1822 | 363  |
| 16/11/2020 |       |      |       |      | 6.84 | 655  | 2.47  | 36   | 3.5  | 0.8 | 102  | 10   |
| 16/11/2020 |       |      |       |      | 6.65 | 638  | 2.53  | 301  | 1.3  | 1.8 | 531  | 71   |
| 16/11/2020 |       |      |       |      | 7.66 | 1388 | 9.15  | 52   | 4    | 0.8 | 56   | 25   |
| 16/11/2020 |       |      |       |      | 7.45 | 1798 | 1.84  | 65   | 33.7 | 0.8 | 283  | 167  |
| 16/11/2020 |       |      |       |      | 9.11 | 2470 | 2.44  | 119  | 80   | 4.6 | 172  | 25   |
| 16/11/2020 |       |      |       |      | 9.51 | 3497 | 1.17  | 182  | 80   | 4.2 | 275  | 67   |
| 18/11/2020 |       |      |       |      | 8.31 | 1950 | 5.02  | 128  | 25.1 | 3.9 | 254  | 23   |
| 18/11/2020 | 39.18 | 5.20 | 37.05 | 8.40 | 8.83 | 1726 | 4.31  | 56   | 45.1 | 2.7 | 84   | 25   |
| 18/11/2020 |       |      |       |      | 7.56 | 3555 | 0.42  | 2440 | 80   | 73  | 2435 | 682  |
| 18/11/2020 |       |      |       |      | 9.17 | 2098 | 4.26  | 33   | 47.1 | 1.6 | 191  | 36   |
| 18/11/2020 | 42.71 | 0.53 |       |      | 9.12 | 1976 | 5.18  | 104  | 40.8 | 0.5 | 190  | 42   |
| 18/11/2020 | 43.93 | 0.27 |       |      | 9.06 | 959  | 9.42  | 10   | 39.3 | 2.9 | 25   | 25   |
| 18/11/2020 |       |      |       |      | 8.67 | 1749 | 1.25  | 90   | 56.1 | 4   | 156  | 36   |
| 18/11/2020 | 43.76 | 0.27 |       |      | 6.18 | 2317 | 1.02  | 3180 | 99.2 | 73  | 2960 | 1547 |
| 18/11/2020 |       |      |       |      | 8.02 | 1585 | 7.25  | 18   | 17.9 | 0.5 | 47   | 25   |
| 18/11/2020 | 43.13 | 0.40 |       |      | 6.85 | 2067 | 1.55  | 214  | 41.5 | 5.4 | 835  | 364  |
| 18/11/2020 |       |      |       |      | 7.48 | 956  | 5.64  | 2999 | 13.8 | 2.3 | 151  | 25   |

|            |       |      |       |       |      |      |      |      |      |     |      |      |
|------------|-------|------|-------|-------|------|------|------|------|------|-----|------|------|
| 18/11/2020 | 43.78 | 0.27 |       |       | 6.35 | 817  | 1.1  | 5800 | 12.6 | 1.6 | 370  | 108  |
| 18/11/2020 | 43.16 | 0.40 |       |       | 7.9  | 1610 | 8.83 | 142  | 6.41 | 0.5 | 25   | 25   |
| 23/11/2020 | 42.87 | 0.80 |       |       | 7.27 | 1477 | 6.62 | 35   | 6.8  | 14  | 48   | 57   |
| 23/11/2020 | 45.59 | 0.13 |       |       | 8.33 | 2309 | 2.65 | 35   | 75.5 | 7.9 | 257  | 65   |
| 23/11/2020 |       |      |       |       | 8.99 | 2391 | 0.66 | 202  | 110  | 11  | 594  | 198  |
| 23/11/2020 | 42.76 | 0.93 |       |       | 7.74 | 2281 | 0.06 | 1076 | 46   | 11  | 1753 | 291  |
| 23/11/2020 | 42.31 | 1.20 |       |       | 7.75 | 2191 | 0.44 | 92   | 60   | 5.4 | 262  | 101  |
| 23/11/2020 | 44.09 | 0.40 | 39.72 | 3.07  | 9.08 | 3607 | 3.07 | 1432 | 80   | 6.1 | 1735 | 232  |
| 23/11/2020 |       |      |       |       | 7.68 | 1175 | 8.41 | 10   | 4    | 0.4 | 96   | 121  |
| 23/11/2020 | 42.35 | 1.20 |       |       | 6.83 | 863  | 1.5  | 77   | 16.8 | 3   | 237  | 90   |
| 23/11/2020 |       |      |       |       | 8.33 | 1997 | 0.38 | 1140 | 37.3 | 9.9 | 1035 | 34   |
| 23/11/2020 |       |      |       |       | 7.99 | 2411 | 0.81 | 33   | 80   | 9.1 | 180  | 128  |
| 23/11/2020 |       |      |       |       | 6.9  | 826  | 0.53 | 509  | 7.8  | 4.4 | 1003 | 104  |
| 23/11/2020 |       |      |       |       | 8.5  | 3637 | 0.75 | 2060 | 80   | 23  | 2290 | 609  |
| 23/11/2020 | 42.68 | 0.93 |       |       | 8.33 | 2309 | 2.65 | 99   | 75.5 | 7.9 | 257  | 135  |
| 23/11/2020 | 41.93 | 1.47 |       |       | 7.49 | 1558 | 3.93 | 284  | 15.3 | 3.6 | 450  | 116  |
| 25/11/2020 |       |      |       |       | 7.11 | 1911 | 0.26 | 558  | 30.6 | 4.7 | 1042 | 232  |
| 25/11/2020 |       |      |       |       | 8.89 | 2568 | 4.93 | 588  | 93.4 | 5.2 | 988  | 93   |
| 25/11/2020 |       |      |       |       | NA   | NA   | NA   | NA   | NA   | NA  | NA   | NA   |
| 25/11/2020 |       |      | 38.28 | 7.47  | 8.08 | 1953 | 1.12 | 597  | 40.4 | 5.4 | 754  | 78   |
| 25/11/2020 |       |      |       |       | 7.46 | 1510 | 0.6  | 2728 | 11.2 | 8.7 | 1907 | 320  |
| 25/11/2020 | 44.64 | 0.27 |       |       | 8.74 | 1860 | 3.06 | 164  | 20.9 | 1.7 | 335  | 63   |
| 25/11/2020 | 43.02 | 0.80 | 40.51 | 1.87  | 8.12 | 2038 | 5.02 | 58   | 24   | 1.8 | 165  | 68   |
| 25/11/2020 | 43.59 | 0.53 |       |       | 8.63 | 2171 | 1.85 | 461  | 43.1 | 3.2 | 589  | 57   |
| 25/11/2020 |       |      | 41.33 | 1.20  | 7.99 | 605  | 5.84 | 181  | 13.3 | 2.7 | 347  | 31   |
| 25/11/2020 |       |      |       |       | 6.68 | 2695 | 0.44 | 7760 | 80   | 25  | 2765 | 1692 |
| 25/11/2020 | 42.21 | 1.33 | 41.57 | 0.93  | 8.08 | 1770 | 1.3  | 77   | 47   | 4.8 | 244  | 103  |
| 25/11/2020 |       |      |       |       | 8.48 | 1935 | 1.61 | 3940 | 77.1 | 11  | 1921 | 213  |
| 25/11/2020 |       |      | 41.91 | 1.33  | 7.4  | 497  | 8.07 | 22   | 5.7  | 1.6 | 44   | 44   |
| 25/11/2020 |       |      | 35.63 | 39.60 | 9.39 | 2814 | 0.95 | 46   | 80   | 10  | 238  | 135  |

|            |       |        |       |        |      |      |      |      |      |     |      |      |
|------------|-------|--------|-------|--------|------|------|------|------|------|-----|------|------|
| 30/11/2020 | 37.96 | 35.47  | 34.61 | 24.80  | 8.51 | 1103 | 1.33 | 75   | 71.6 | 3.1 | 110  | 39   |
| 30/11/2020 | 39.82 | 12.27  | 36.13 | 9.47   | 7.82 | 936  | 0.64 | 964  | 54.7 | 4.6 | 1670 | 62   |
| 30/11/2020 | 43.56 | 1.20   |       |        | 7.27 | 499  | 3.64 | 77   | 1.7  | 2.1 | 128  | 12   |
| 30/11/2020 | 36.13 | 107.60 | 32.57 | 86.00  | 8.81 | 850  | 1.07 | 178  | 94.4 | 6.7 | 285  | 108  |
| 30/11/2020 | 42.00 | 3.33   |       |        | 6.35 | 1045 | 0.47 | 7528 | 85.1 | 25  | 3512 | 1144 |
| 30/11/2020 | 35.17 | 191.73 | 31.98 | 126.13 | 9.21 | 1397 | 2.68 | 207  | 80   | 8.6 | 405  | 74   |
| 30/11/2020 | 41.57 | 4.00   |       |        | 6.33 | 143  | 4.14 | 111  | 3.6  | 0.6 | 117  | 5    |
| 30/11/2020 | 36.86 | 69.20  | 33.13 | 63.87  | 7.22 | 251  | 2.84 | 88   | 20.3 | 2   | 142  | 13   |
| 30/11/2020 | 41.99 | 3.07   |       |        | 6.96 | 719  | 0.22 | 6240 | 75.1 | 13  | 3380 | 151  |
| 30/11/2020 |       |        |       |        | 8.6  | 765  | 2.59 | 96   | 27.3 | 1.8 | 167  | 44   |
| 01/12/2020 | 41.47 | 4.27   |       |        | 9.17 | 1427 | 1.57 | 2142 | 80   | 6   | 1801 | 176  |
| 01/12/2020 | 38.81 | 23.20  | 35.34 | 15.07  | 6.65 | 736  | 0.77 | 517  | 34.5 | 3.5 | 875  | 142  |
| 01/12/2020 | 41.20 | 5.07   |       |        | 8.91 | 1304 | 1.14 | 888  | 80   | 6.8 | 1036 | 111  |
| 01/12/2020 | 36.02 | 114.53 | 32.89 | 70.40  | NA   | NA   | NA   | NA   | NA   | NA  | NA   | NA   |
| 01/12/2020 | 38.11 | 32.67  | 36.79 | 6.00   | NA   | NA   | NA   | NA   | NA   | NA  | NA   | NA   |
| 01/12/2020 |       |        |       |        | 9.26 | 784  | 1.14 | 78   | 80   | 8.9 | 290  | 66   |
| 01/12/2020 | 35.64 | 143.47 | 31.87 | 132.93 | 7.07 | 383  | 1.59 | 85   | 22.6 | 2.9 | 124  | 21   |
| 01/12/2020 | 40.39 | 8.27   |       |        | 8.68 | 860  | 3.81 | 408  | 80   | 9.6 | 815  | 93   |
| 01/12/2020 |       |        | 35.93 | 11.47  | 7.29 | 278  | 7.43 | 504  | 7.4  | 3.1 | 226  | 6    |
| 01/12/2020 | 40.90 | 6.67   | 36.68 | 6.40   | 8.7  | 773  | 0.62 | 1980 | 114  | 16  | 1732 | 183  |
| 01/12/2020 | 38.69 | 22.93  | 35.00 | 19.07  | 7.45 | 583  | 4.1  | 34   | 18.1 | 3.4 | 191  | 62   |
| 02/12/2020 | 41.61 | 4.00   |       |        | 7.68 | 670  | 2.22 | 1184 | 25.9 | 4.2 | 2374 | 125  |
| 02/12/2020 | 37.18 | 57.47  | 32.68 | 81.20  | 7.81 | 688  | 4.42 | 57   | 30.6 | 2.6 | 204  | 45   |
| 02/12/2020 | 40.57 | 7.33   |       |        | 7.67 | 648  | 1.98 | 328  | 25.4 | 3.5 | 101  | 59   |
| 02/12/2020 |       |        |       |        | 8.43 | 680  | 5.73 | 226  | 50   | 5.2 | 564  | 81   |
| 02/12/2020 |       |        |       |        | 8.94 | 930  | 2.53 | 569  | 80   | 5.8 | 822  | 149  |
| 02/12/2020 | 35.02 | 251.47 | 30.70 | 279.20 | 6.89 | 562  | 0.94 | 150  | 22.3 | 3.2 | 295  | 178  |
| 02/12/2020 |       |        |       |        | 8.97 | 1070 | 2.29 | 563  | 80   | 5.2 | 869  | 117  |
| 02/12/2020 |       |        | 35.07 | 17.87  | 7.41 | 297  | 7.74 | 421  | 9.2  | 3.2 | 529  | 28   |
| 02/12/2020 | 41.85 | 4.13   |       |        | 8.88 | 988  | 3.34 | 508  | 80   | 14  | 1013 | 272  |

|            |       |         |       |         |      |      |      |      |      |     |      |      |
|------------|-------|---------|-------|---------|------|------|------|------|------|-----|------|------|
| 02/12/2020 |       |         |       |         | 9.38 | 1505 | 1.63 | 73   | 80   | 17  | 285  | 155  |
| 02/12/2020 | 37.19 | 64.27   | 32.65 | 81.87   | 9.23 | 1263 | 1.91 | 1596 | 80   | 10  | 1866 | 187  |
| 02/12/2020 | 41.73 | 3.60    | 35.70 | 12.00   | 6.71 | 467  | 1.55 | 203  | 37   | 2.6 | 422  | 169  |
| 02/12/2020 | 40.17 | 10.13   | 35.69 | 12.93   | 6.73 | 288  | 2.23 | 40   | 20.1 | 1.3 | 190  | 56   |
| 03/12/2020 |       |         |       |         | NA   | NA   | NA   | NA   | NA   | NA  | NA   | NA   |
| 03/12/2020 | 42.19 | 2.80    |       |         | NA   | NA   | NA   | NA   | NA   | NA  | NA   | NA   |
| 03/12/2020 |       |         |       |         | NA   | NA   | NA   | NA   | NA   | NA  | NA   | NA   |
| 03/12/2020 | 34.35 | 314.13  | 31.51 | 306.67  | NA   | NA   | NA   | NA   | NA   | NA  | NA   | NA   |
| 03/12/2020 | 43.28 | 2.93    |       |         | NA   | NA   | NA   | NA   | NA   | NA  | NA   | NA   |
| 03/12/2020 | 42.50 | 4.53    | 36.30 | 4.53    | NA   | NA   | NA   | NA   | NA   | NA  | NA   | NA   |
| 03/12/2020 | 41.27 | 9.07    |       |         | NA   | NA   | NA   | NA   | NA   | NA  | NA   | NA   |
| 03/12/2020 | 41.62 | 8.27    | 35.47 | 8.00    | NA   | NA   | NA   | NA   | NA   | NA  | NA   | NA   |
| 03/12/2020 | 41.24 | 11.07   | 36.19 | 4.80    | NA   | NA   | NA   | NA   | NA   | NA  | NA   | NA   |
| 03/12/2020 | 42.91 | 3.60    |       |         | NA   | NA   | NA   | NA   | NA   | NA  | NA   | NA   |
| 03/12/2020 | 42.22 | 6.00    | 35.27 | 9.20    | NA   | NA   | NA   | NA   | NA   | NA  | NA   | NA   |
| 03/12/2020 | 41.15 | 9.73    | 36.34 | 4.40    | NA   | NA   | NA   | NA   | NA   | NA  | NA   | NA   |
| 07/12/2020 | 43.57 | 2.53    |       |         | NA   | NA   | NA   | NA   | NA   | NA  | NA   | NA   |
| 07/12/2020 | 42.58 | 4.53    | 38.84 | 0.80    | NA   | NA   | NA   | NA   | NA   | NA  | NA   | NA   |
| 07/12/2020 | 32.10 | 1683.87 | 28.18 | 1313.07 | NA   | NA   | NA   | NA   | NA   | NA  | NA   | NA   |
| 07/12/2020 | 42.31 | 5.07    |       |         | NA   | NA   | NA   | NA   | NA   | NA  | NA   | NA   |
| 07/12/2020 | 40.35 | 15.33   |       |         | NA   | NA   | NA   | NA   | NA   | NA  | NA   | NA   |
| 07/12/2020 | 43.15 | 3.07    |       |         | NA   | NA   | NA   | NA   | NA   | NA  | NA   | NA   |
| 07/12/2020 | 41.77 | 6.93    | 35.60 | 7.33    | NA   | NA   | NA   | NA   | NA   | NA  | NA   | NA   |
| 07/12/2020 | 41.04 | 10.40   | 36.51 | 4.00    | NA   | NA   | NA   | NA   | NA   | NA  | NA   | NA   |
| 07/12/2020 | 41.07 | 11.07   | 36.53 | 3.87    | NA   | NA   | NA   | NA   | NA   | NA  | NA   | NA   |
| 08/12/2020 | 41.33 | 10.27   |       |         | 7.84 | 1997 | 1.51 | 60   | 32.8 | 3.5 | 65   | 31   |
| 08/12/2020 | 40.71 | 12.93   |       |         | 7.44 | 2426 | 0.49 | 2052 | 49.9 | 10  | 447  | 185  |
| 08/12/2020 | 41.90 | 6.40    |       |         | 7.07 | 5086 | 0.17 | 9844 | 80   | 26  | 1873 | 1268 |
| 08/12/2020 |       |         |       |         | 7.13 | 1809 | 1.76 | 426  | 29.1 | 3.5 | 188  | 47   |
| 08/12/2020 |       |         |       |         | 8.96 | 2533 | 5.77 | 107  | 90.1 | 4.3 | 171  | 38   |

|            |       |        |       |        |      |      |      |      |      |     |      |      |
|------------|-------|--------|-------|--------|------|------|------|------|------|-----|------|------|
| 08/12/2020 |       |        |       |        | 8.85 | 2838 | 2.89 | 529  | 80   | 6.2 | 821  | 87   |
| 08/12/2020 | 36.90 | 110.27 | 32.35 | 73.07  | 6.52 | 2475 | 0.17 | 1496 | 57.8 | 13  | 449  | 586  |
| 08/12/2020 | 42.61 | 4.27   | 36.07 | 5.20   | 8.79 | 3492 | 0.41 | 680  | 80   | 5.4 | 808  | 149  |
| 08/12/2020 | 35.07 | 312.40 | 30.03 | 345.47 | 7.08 | 2457 | 7.63 | 17   | 15.3 | 1.8 | 51   | 21   |
| 08/12/2020 |       |        |       |        | 6.94 | 735  | 4.57 | 26   | 15.1 | 1.5 | 110  | 43   |
| 08/12/2020 |       |        | 29.77 | 406.80 | 6.92 | 2372 | 5.69 | 83   | 15.6 | 1.8 | 106  | 26   |
| 08/12/2020 | 42.77 | 2.53   |       |        | 8.31 | 2836 | 2.59 | 1028 | 80   | 13  | 1140 | 106  |
| 08/12/2020 | 44.74 | 1.20   |       |        | 9.3  | 3582 | 3.41 | 49   | 80   | 13  | 83   | 63   |
| 08/12/2020 | 40.60 | 10.40  | 36.42 | 4.13   | 9.12 | 2896 | 0.75 | 614  | 80   | 9.4 | 424  | 108  |
| 09/12/2020 | 42.65 | 2.67   | 36.54 | 38.67  | 9.17 | 3068 | 1.21 | 129  | 80   | 11  | 122  | 62   |
| 09/12/2020 |       |        |       |        | 8.25 | 1222 | 4.08 | 19   | 44.7 | 4   | 70   | 24   |
| 09/12/2020 | 34.22 | 559.33 |       |        | 6.98 | 2094 | 0.25 | 368  | 48.6 | 5.7 | 663  | 56   |
| 09/12/2020 | 42.54 | 2.80   | 38.23 | 8.13   | 9.15 | 2838 | 0.55 | 85   | 114  | 3.2 | 85   | 73   |
| 09/12/2020 | 44.64 | 0.80   |       |        | 9.1  | 3069 | 0.73 | 467  | 80   | 4   | 740  | 200  |
| 09/12/2020 | 39.98 | 14.53  | 34.28 | 55.20  | 6.47 | 2713 | 0.31 | 3264 | 68.3 | 16  | 1786 | 923  |
| 09/12/2020 |       |        |       |        | 8.91 | 3938 | 0.54 | 348  | 80   | 5.4 | 429  | 111  |
| 09/12/2020 | 42.43 | 4.67   |       |        | 7.35 | 2170 | 4.22 | 207  | 32.5 | 1.2 | 283  | 64   |
| 09/12/2020 |       |        |       |        | 7.69 | 1331 | 5.82 | 2    | 1.8  | 1.6 | 10   | 10   |
| 09/12/2020 |       |        |       |        | 7.09 | 3455 | 0.38 | 2236 | 91.2 | 20  | 2093 | 586  |
| 09/12/2020 | 43.61 | 1.47   |       |        | 7.34 | 2178 | 2.51 | 852  | 42.8 | 6   | 1193 | 169  |
| 09/12/2020 |       |        |       |        | 7.83 | 2005 | 5.82 | 26   | 25.7 | 1.2 | 45   | 19   |
| 09/12/2020 |       |        |       |        | 9.11 | 2161 | 0.22 | 61   | 97.4 | 8.4 | 118  | 62   |
| 09/12/2020 | 42.77 | 2.80   | 40.42 | 3.33   | 6.48 | 852  | 0.45 | 147  | 2.9  | 0.9 | 109  | 26   |
| 09/12/2020 | 41.30 | 6.40   | 35.87 | 20.53  | 7.35 | 1911 | 0.83 | 133  | 46.2 | 4.5 | 118  | 56   |
| 09/12/2020 | 42.20 | 3.87   |       |        | 6.76 | 856  | 0.3  | 272  | 3.5  | 1.3 | 235  | 73   |
| 09/12/2020 | 41.06 | 7.73   | 45.80 | 0.13   | 7.66 | 1888 | 0.73 | 68   | 44.4 | 4.3 | 47   | 41   |
| 09/12/2020 |       |        |       |        | 9.08 | 2352 | 0.68 | 102  | 112  | 8   | 100  | 68   |
| 09/12/2020 |       |        |       |        | 6.85 | 4978 | 0.2  | 528  | 80   | 23  | 1846 | 1008 |
| 09/12/2020 |       |        | 45.71 | 0.13   | 6.02 | 4896 | 0.25 | 299  | 80   | 22  | 891  | 473  |
| 10/12/2020 | 40.83 | 2.13   |       |        | 7.73 | 2715 | 3.03 | 0.94 | 59.2 | 2.7 | 363  | 56   |

|            |       |       |       |        |      |      |      |       |      |     |      |     |
|------------|-------|-------|-------|--------|------|------|------|-------|------|-----|------|-----|
| 10/12/2020 |       |       |       |        | 7.48 | 2443 | 2.34 | 0.78  | 44.3 | 2.3 | 166  | 57  |
| 10/12/2020 |       |       |       |        | 7.59 | 2419 | 0.36 | 3.59  | 51.5 | 5.6 | 879  | 84  |
| 10/12/2020 | 40.47 | 2.67  |       |        | 8.68 | 4054 | 0.28 | 5.78  | 80   | 11  | 1426 | 168 |
| 10/12/2020 |       |       |       |        | 7.84 | 1358 | 9.4  | 0.06  | 2.7  | 1.9 | 13   | 6   |
| 10/12/2020 |       |       |       |        | 9.45 | 5734 | 1.56 | 0.79  | 80   | 23  | 194  | 85  |
| 10/12/2020 | 40.77 | 2.27  |       |        | NA   | NA   | NA   | NA    | NA   | NA  | NA   | NA  |
| 10/12/2020 | 40.86 | 4.00  |       |        | 8.55 | 2576 | 8.54 | 63    | 90.2 | 4.8 | 64   | 39  |
| 10/12/2020 |       |       |       |        | 7.13 | 1824 | 3.07 | 274   | 34.9 | 6.1 | 306  | 57  |
| 10/12/2020 |       |       |       |        | 7.73 | 2732 | 7.41 | 173   | 88.1 | 5.7 | 321  | 56  |
| 10/12/2020 | 35.46 | 90.13 | 36.05 | 113.87 | 7.37 | 3377 | 1.05 | 2496  | 80   | 25  | 2875 | 664 |
| 10/12/2020 |       |       |       |        | 8.7  | 4759 | 2.04 | 571   | 80   | 11  | 597  | 92  |
| 10/12/2020 | 39.77 | 4.53  |       |        | 7.72 | 2260 | 1.14 | 10.43 | 38.5 | 6.7 | 1256 | 67  |
| 10/12/2020 | 39.82 | 4.00  |       |        | NA   | NA   | NA   | NA    | NA   | NA  | NA   | NA  |
| 10/12/2020 |       |       |       |        | 9.23 | 3408 | 2.48 | 0.78  | 80   | 9.9 | 134  | 37  |
| 10/12/2020 |       |       |       |        | 9.15 | 3548 | 0.88 | 0.82  | 80   | 9.8 | 153  | 38  |
| 10/12/2020 |       |       |       |        | 7.05 | 1667 | 0.8  | 5.62  | 75.6 | 16  | 1062 | 174 |
| 10/12/2020 | 38.09 | 12.27 |       |        | 7.69 | 1697 | 0.42 | 0.73  | 45.4 | 3.1 | 204  | 107 |
| 10/12/2020 | 41.33 | 1.60  |       |        | 6.84 | 780  | 7.26 | 0.86  | 6.4  | 2.4 | 351  | 42  |
| 10/12/2020 | 41.03 | 1.87  |       |        | 7.38 | 1404 | 5.47 | 1.54  | 28.3 | 4   | 340  | 73  |
| 10/12/2020 | 39.83 | 4.00  | 40.11 | 4.13   | 7.14 | 1430 | 5.98 | 0.69  | 32.4 | 4.5 | 129  | 56  |
| 10/12/2020 |       |       |       |        | 8.9  | 2603 | 1.04 | 6.83  | 80   | 11  | 635  | 55  |
| 11/12/2020 |       |       |       |        | NA   | NA   | NA   | NA    | NA   | NA  | NA   | NA  |
| 11/12/2020 |       |       |       |        | NA   | NA   | NA   | NA    | NA   | NA  | NA   | NA  |
| 11/12/2020 |       |       |       |        | NA   | NA   | NA   | NA    | NA   | NA  | NA   | NA  |
| 11/12/2020 | 41.29 | 6.00  |       |        | NA   | NA   | NA   | NA    | NA   | NA  | NA   | NA  |
| 11/12/2020 |       |       |       |        | NA   | NA   | NA   | NA    | NA   | NA  | NA   | NA  |
| 11/12/2020 |       |       |       |        | NA   | NA   | NA   | NA    | NA   | NA  | NA   | NA  |
| 11/12/2020 |       |       |       |        | NA   | NA   | NA   | NA    | NA   | NA  | NA   | NA  |
| 11/12/2020 | 41.33 | 5.73  | 39.60 | 11.20  | NA   | NA   | NA   | NA    | NA   | NA  | NA   | NA  |
| 11/12/2020 |       |       |       |        | NA   | NA   | NA   | NA    | NA   | NA  | NA   | NA  |

|            |       |       |       |       |      |      |       |      |      |     |      |     |
|------------|-------|-------|-------|-------|------|------|-------|------|------|-----|------|-----|
| 11/12/2020 | 41.34 | 5.73  |       |       | NA   | NA   | NA    | NA   | NA   | NA  | NA   | NA  |
| 14/12/2020 |       |       |       |       | 8.22 | 1126 | 10.36 | 11   | 4.6  | 0.9 | 21   | 20  |
| 14/12/2020 | 40.85 | 2.13  |       |       | 7.62 | 1127 | 10.33 | 16   | 4.5  | 0.8 | 23   | 20  |
| 14/12/2020 | 40.91 | 2.00  |       |       | 8.63 | 3673 | 2.09  | 97   | 80   | 12  | 187  | 106 |
| 14/12/2020 |       |       |       |       | 7.03 | 5171 | 0.95  | 1131 | 80   | 14  | 1802 | 651 |
| 14/12/2020 | 40.67 | 2.40  | 39.80 | 14.13 | 8.04 | 2015 | 7.39  | 54   | 29.9 | 3.2 | 109  | 57  |
| 14/12/2020 | 39.39 | 5.47  | 41.41 | 6.00  | 7.91 | 3636 | 1.51  | 300  | 80   | 5.8 | 844  | 116 |
| 14/12/2020 | 40.99 | 1.87  |       |       | 7.28 | 1689 | 4.14  | 212  | 69.4 | 13  | 493  | 149 |
| 14/12/2020 |       |       |       |       | 7.2  | 1826 | 1.28  | 11   | 21.6 | 1.3 | 366  | 85  |
| 14/12/2020 | 38.33 | 11.33 | 37.26 | 58.00 | 6.45 | 2288 | 2.06  | 1084 | 58.1 | 11  | 1885 | 313 |
| 14/12/2020 |       |       | 40.57 | 9.20  | 8.41 | 2899 | 7.92  | 127  | 105  | 6.4 | 118  | 80  |
| 14/12/2020 | 41.16 | 1.73  |       |       | 8.48 | 2999 | 2.05  | 68   | 80   | 12  | 149  | 92  |
| 14/12/2020 | 44.47 | 0.27  |       |       | 7.75 | 3076 | 5.2   | 456  | 80   | 12  | 655  | 77  |
| 14/12/2020 |       |       |       |       | 8.37 | 2052 | 8.77  | 244  | 43.7 | 3.5 | 31   | 30  |
| 14/12/2020 | 43.55 | 0.40  |       |       | 7.47 | 3355 | 3.4   | 772  | 80   | 9.8 | 1150 | 119 |
| 14/12/2020 | 38.49 | 9.47  | 40.96 | 7.47  | 7.98 | 1977 | 9.09  | 13   | 47.7 | 4.9 | 40   | 36  |
| 14/12/2020 |       |       |       |       | 9.04 | 3142 | 1.53  | 206  | 80   | 7.8 | 400  | 109 |
| 14/12/2020 |       |       | 39.73 | 14.67 | 8.45 | 3702 | 4.54  | 150  | 80   | 11  | 218  | 94  |
| 14/12/2020 | 40.81 | 2.13  |       |       | 6.38 | 588  | 8.03  | 64   | 7.3  | 1.1 | 139  | 47  |
| 14/12/2020 |       |       |       |       | 8.09 | 3276 | 0.73  | 52   | 2.5  | 0.5 | 73   | 29  |
| 14/12/2020 | 40.79 | 2.13  |       |       | 6.64 | 701  | 5.38  | 123  | 8.3  | 3   | 241  | 72  |
| 14/12/2020 | 41.01 | 1.87  | 41.90 | 4.53  | 7.12 | 882  | 3.62  | 106  | 19.2 | 1.8 | 215  | 82  |
| 14/12/2020 | 40.37 | 3.07  |       |       | 6.81 | 886  | 1.39  | 133  | 17.8 | 1.9 | 228  | 70  |
| 15/12/2020 |       |       |       |       | 8.24 | 1655 | 10.36 | 28   | 27.9 | 3.1 | 60   | 20  |
| 15/12/2020 | 39.88 | 7.73  | 39.56 | 19.07 | 6.64 | 1790 | 0.92  | 1117 | 26.7 | 3.3 | 899  | 88  |
| 15/12/2020 |       |       |       |       | 8.58 | 3674 | 0.69  | 1392 | 80   | 9.1 | 1552 | 223 |
| 15/12/2020 | 37.41 | 4.93  |       |       | 6.26 | 2082 | 0.97  | 3140 | 35.5 | 7.1 | 2713 | 827 |
| 15/12/2020 |       |       |       |       | 8.84 | 4085 | 0.43  | 237  | 80   | 5.6 | 283  | 79  |
| 15/12/2020 |       |       |       |       | 8.92 | 5052 | 1.35  | 756  | 80   | 14  | 852  | 169 |
| 15/12/2020 | 42.79 | 2.00  |       |       | 9.07 | 3240 | 1     | 151  | 80   | 9.3 | 249  | 85  |

|            |       |        |       |        |      |      |       |      |      |     |      |     |
|------------|-------|--------|-------|--------|------|------|-------|------|------|-----|------|-----|
| 15/12/2020 |       |        | 42.58 | 3.07   | 8.08 | 2827 | 0.67  | 65   | 97.5 | 6.7 | 242  | 119 |
| 15/12/2020 |       |        |       |        | 8.09 | 3276 | 0.73  | 254  | 80   | 9.3 | 337  | 127 |
| 15/12/2020 | 31.03 | 189.87 | 33.43 | 416.67 | 7.42 | 1516 | 4.56  | 5    | 7.5  | 0.9 | NA   | 30  |
| 15/12/2020 | 34.64 | 190.67 | 37.37 | 46.27  | 7.24 | 1787 | 3.74  | 26   | 20.4 | 1.2 | NA   | 47  |
| 15/12/2020 |       |        | 38.76 | 25.20  | 8.8  | 3945 | 2.33  | 380  | 80   | 15  | 607  | 121 |
| 15/12/2020 |       |        |       |        | 8.61 | 4053 | 4.07  | 439  | 80   | 16  | 678  | 98  |
| 15/12/2020 | 36.92 | 38.27  | 37.29 | 87.07  | 7.26 | 1664 | 4.12  | 9    | 37   | 4.1 | 130  | 44  |
| 15/12/2020 | 35.04 | 112.67 | 36.01 | 116.93 | 6.96 | 1653 | 0.52  | 71   | 38.2 | 4   | 124  | 47  |
| 15/12/2020 | 38.22 | 18.13  | 39.19 | 20.27  | 6.93 | 965  | 1.85  | 338  | 2.9  | 0.9 | 240  | 86  |
| 15/12/2020 |       |        |       |        | 7.64 | 2395 | 3.26  | 61   | 55.4 | 5.3 | 133  | 45  |
| 15/12/2020 |       |        |       |        | 8.16 | 3549 | 7.75  | 21   | 80   | 4.2 | NA   | 47  |
| 15/12/2020 |       |        |       |        | 7.09 | 1984 | 0.38  | 974  | 32   | 11  | 1273 | 247 |
| 15/12/2020 |       |        |       |        | 8.24 | 1334 | 10.6  | 5    | 5.3  | 1.6 | NA   | 31  |
| 16/12/2020 |       |        |       |        | 8.26 | 586  | 10.57 | 32   | 1.1  | 1.5 | 349  | 256 |
| 16/12/2020 |       |        |       |        | 7.71 | 844  | 8.53  | 158  | 11.6 | 1.8 | 415  | 34  |
| 16/12/2020 |       |        | 43.40 | 1.60   | 8.35 | 1271 | 5.46  | 1328 | 45.9 | 6.2 | 1919 | 152 |
| 16/12/2020 | 38.71 | 13.47  | 39.48 | 14.27  | 7.51 | 1201 | 8.05  | 869  | 17.4 | 6.2 | 1580 | 367 |
| 16/12/2020 |       |        |       |        | 8.95 | 1139 | 9.57  | 92   | 38.1 | 3.2 | 157  | 54  |
| 16/12/2020 | 42.61 | 1.87   | 44.09 | 1.07   | 9.07 | 1419 | 7.84  | 86   | 44.9 | 6.7 | 346  | 202 |
| 16/12/2020 |       |        |       |        | 7.8  | 890  | 9.94  | 44   | 12.3 | 7.3 | 173  | 116 |
| 16/12/2020 |       |        |       |        | 8.75 | 2156 | 7.58  | 145  | 66.2 | 14  | 456  | 304 |
| 16/12/2020 |       |        |       |        | NA   | NA   | NA    | NA   | NA   | NA  | NA   | NA  |
| 16/12/2020 | 36.78 | 74.13  | 37.69 | 35.33  | NA   | NA   | NA    | NA   | NA   | NA  | NA   | NA  |
| 16/12/2020 |       |        |       |        | NA   | NA   | NA    | NA   | NA   | NA  | NA   | NA  |
| 16/12/2020 |       |        |       |        | NA   | NA   | NA    | NA   | NA   | NA  | NA   | NA  |
| 16/12/2020 |       |        |       |        | NA   | NA   | NA    | NA   | NA   | NA  | NA   | NA  |
| 16/12/2020 | 41.54 | 5.20   |       |        | NA   | NA   | NA    | NA   | NA   | NA  | NA   | NA  |
| 16/12/2020 | 40.79 | 3.73   |       |        | 7.58 | 260  | 10.24 | 84   | 0.8  | 1.7 | 168  | 31  |
| 16/12/2020 | 37.01 | 35.07  | 37.93 | 33.87  | 7.12 | 133  | 10.42 | 61   | 4    | 0.3 | 122  | 55  |
| 16/12/2020 | 37.04 | 35.60  | 37.36 | 46.53  | 7.1  | 127  | 10.69 | 55   | 4    | 0.3 | 144  | 77  |

|            |       |        |       |        |      |      |       |      |      |     |      |      |
|------------|-------|--------|-------|--------|------|------|-------|------|------|-----|------|------|
| 16/12/2020 | 36.40 | 51.60  | 37.11 | 53.47  | 9.45 | 3049 | 9.26  | 246  | 80   | 11  | 829  | 324  |
| 16/12/2020 | 36.62 | 44.13  | 36.43 | 78.27  | 9.5  | 3247 | 9.54  | 184  | 80   | 11  | 596  | 329  |
| 16/12/2020 |       |        |       |        | 7.04 | 1112 | 9.42  | 258  | 8.9  | 1   | 498  | 107  |
| 16/12/2020 |       |        |       |        | 7.18 | 510  | 8.66  | 114  | 3.5  | 0.8 | 406  | 104  |
| 16/12/2020 |       |        |       |        | 9.27 | 1548 | 10.06 | 71   | 59.6 | 9   | 310  | 281  |
| 16/12/2020 | 39.65 | 7.47   |       |        | 9.19 | 2807 | 9.02  | 232  | 98.3 | 16  | 1390 | 1133 |
| 17/12/2020 |       |        |       |        | 7.84 | 1657 | 10.05 | 45   | 9.3  | 5.2 | 131  | 79   |
| 17/12/2020 | 41.02 | 3.33   |       |        | 7.71 | 1513 | 9.73  | 302  | 14.6 | 3   | 300  | 19   |
| 17/12/2020 |       |        |       |        | NA   | NA   | NA    | NA   | NA   | NA  | NA   | NA   |
| 17/12/2020 |       |        |       |        | NA   | NA   | NA    | NA   | NA   | NA  | NA   | NA   |
| 17/12/2020 | 39.67 | 15.20  | 39.80 | 10.00  | NA   | NA   | NA    | NA   | NA   | NA  | NA   | NA   |
| 17/12/2020 | 38.04 | 37.60  | 39.44 | 12.27  | NA   | NA   | NA    | NA   | NA   | NA  | NA   | NA   |
| 17/12/2020 |       |        |       |        | 9    | 2207 | 11.09 | 626  | 76.2 | 6.2 | 1145 | 225  |
| 17/12/2020 |       |        |       |        | 8.21 | 2344 | 8.75  | 1176 | 37   | 5.5 | 1639 | 481  |
| 17/12/2020 | 41.02 | 3.33   |       |        | 9.08 | 2477 | 10.32 | 128  | 94.2 | 5.7 | 488  | 162  |
| 17/12/2020 | 34.75 | 231.20 | 36.66 | 63.47  | NA   | NA   | NA    | NA   | NA   | NA  | NA   | NA   |
| 17/12/2020 | 33.21 | 632.93 | 34.72 | 212.53 | NA   | NA   | NA    | NA   | NA   | NA  | NA   | NA   |
| 17/12/2020 |       |        |       |        | 9.35 | 2231 | 6.28  | 884  | 109  | 10  | 1789 | 506  |
| 17/12/2020 | 40.75 | 3.87   |       |        | 9.03 | 1728 | 2.35  | 73   | 51   | 4.7 | 321  | 167  |
| 17/12/2020 | 40.61 | 4.27   |       |        | 8.97 | 2117 | 3.78  | 215  | 49.5 | 6.9 | 369  | 140  |
| 17/12/2020 |       |        |       |        | 8.84 | 1168 | 8.12  | 262  | 27.5 | 5.2 | 1074 | 599  |
| 17/12/2020 | 37.48 | 26.93  | 37.92 | 34.13  | 6.99 | 634  | 7.69  | 79   | 0.6  | 1.9 | 150  | 55   |
| 17/12/2020 | 39.14 | 10.00  |       |        | 7.38 | 2751 | 9.29  | 1056 | 23.2 | 4.6 | 1354 | 219  |
| 17/12/2020 | 39.92 | 6.27   |       |        | 7.31 | 2683 | 5.17  | 1698 | 23   | 4.7 | 1606 | 277  |
| 17/12/2020 |       |        |       |        | 9.61 | 2170 | 8.39  | 417  | 105  | 9   | 842  | 250  |
| 17/12/2020 |       |        |       |        | 9.65 | 2866 | 12.1  | 660  | 111  | 8.4 | 1238 | 270  |
| 17/12/2020 |       |        |       |        | 9.53 | 2001 | 8.51  | 445  | 97.8 | 7.7 | 1402 | 265  |
| 17/12/2020 |       |        |       |        | 9.61 | 3265 | 8.65  | 3118 | 80   | 10  | 1915 | 516  |
| 17/12/2020 |       |        |       |        | 8.42 | 820  | 10.41 | 162  | 2    | 3.1 | 333  | 113  |
| 17/12/2020 |       |        |       |        | 9.41 | 2274 | 11.01 | 1246 | 107  | 17  | 2241 | 404  |
